# Supplementary material for: Multi-method evaluation of a national clinical fellowship programme to build leadership capacity for quality improvement
Source: PubMed Central journal article supplement — BMJ Open Qual. 2020 Oct 14;9(4):e000978. doi: 10.1136/bmjoq-2020-000978 (PMC7559044; doi:10.1136/bmjoq-2020-000978), 2020-10-14
Supplement: bmjoq-2020-000978supp002.pdf [file bmjoq-2020-000978supp002.pdf]

## Supplementary file 2 – SQSF Post-Programme Evaluation Questionnaire

### **Part 1- Your Views on the Content, Implementation and Quality of the Fellowship Programme**

In this section, you are presented with a series of statements related to the implementation quality of the Fellowship Programme as well as your satisfaction with its content, components and benefits.

In terms of your experience of the Fellowship Programme, please rate your level of agreement with the following with the statements below from 1 (Strongly Disagree) to 5 (Strongly Agree).

|                                                                                                                                            | 1Strongly disagree    | 2 Disagree            | 3Neither agree or disagree | 4 Agree               | 5 Strongly agree      |
|--------------------------------------------------------------------------------------------------------------------------------------------|-----------------------|-----------------------|----------------------------|-----------------------|-----------------------|
| I was satisfied with the reading materials and educational resources provided                                                              | <input type="radio"/> | <input type="radio"/> | <input type="radio"/>      | <input type="radio"/> | <input type="radio"/> |
| I was satisfied with the presentations by Subject Matter Experts                                                                           | <input type="radio"/> | <input type="radio"/> | <input type="radio"/>      | <input type="radio"/> | <input type="radio"/> |
| I was satisfied that the programme content is relevant to my work/role                                                                     | <input type="radio"/> | <input type="radio"/> | <input type="radio"/>      | <input type="radio"/> | <input type="radio"/> |
| I was satisfied with the format of the overall programme (e.g. the balance between presentations, group work activity, self-learning etc.) | <input type="radio"/> | <input type="radio"/> | <input type="radio"/>      | <input type="radio"/> | <input type="radio"/> |
| Overall, I thought the fellowship programme was high quality in terms of content and organisation                                          | <input type="radio"/> | <input type="radio"/> | <input type="radio"/>      | <input type="radio"/> | <input type="radio"/> |
| Please comment on any aspect of the above                                                                                                  |                       |                       |                            |                       |                       |

**In terms of your experience of the Fellowship Programme, please rate the value assigned to the following statements below from 1 (No Value) to 5 (High Value). Which intended outcomes of the Fellowship Programme were of most value to you?**

Supporting effective workforce development in safety and improvement

1 – No value 2 – Low value 3 – Neutral 4 – Somewhat valuable 5 – High value

Developing and strengthening local clinical leadership capability to support national safety and improvement efforts

1 – No value 2 – Low value 3 – Neutral 4 – Somewhat valuable 5 – High value

Supporting effective Implementation (how to plan and implement a quality improvement project at the individual, organizational, community and systems levels).

1 – No value 2 – Low value 3 – Neutral 4 – Somewhat valuable 5 – High value

Facilitating better Context Assessment (how to identify factors in the internal and external implementation contexts which may affect implementation of improvement interventions)

1 – No value 2 – Low value 3 – Neutral 4 – Somewhat valuable 5 – High value

Promoting Stakeholder engagement (how to strengthen existing collaborations within NHS Scotland/Your country and beyond and actively engage key stakeholders at all stages of the improvement process)

1 – No value 2 – Low value 3 – Neutral 4 – Somewhat valuable 5 – High value

Embedding sustainability, scale and spread (how to plan for and assess the sustainability, scaling up and spreading a long-term quality improvement and patient safety culture)

1 – No value 2 – Low value 3 – Neutral 4 – Somewhat valuable 5 – High value

Supporting Evaluation (how to monitor and evaluate improvement interventions and assess outcomes)

1 – No value 2 – Low value 3 – Neutral 4 – Somewhat valuable 5 – High value

Please comment on any aspect of the above:

**Where there any other aspects of the Fellowship Programme that you feel are important to:**

Your Job (If yes, please explain)

Your Organisation (If yes, please explain)

Your country's health and social services (If yes, please explain)

## **Part 2 - Your Overall Experiences of the Fellowship Programme**

Please can you summarise your overall experience of the Fellowship Programme?

*Please consider how difficult it was to prioritise the fellowship alongside other job and organisational priorities and how the Fellowship Programme experience influenced your professional development?*

## **Part 3-Your views about the knowledge and skills gained through the Fellowship Programme**

Please rate your level of agreement with the statements below from 1 (Strongly Disagree) to 5 (Strongly Agree).

The Fellowship Programme has enhanced my knowledge about leadership and quality improvement more broadly?

1 – Strongly disagree • 2 – Disagree • 3 – Neither agree or disagree • 4 – Agree • 5 – Strongly agree

The Fellowship Programme increased my self-confidence to practice quality improvement and patient safety?

1 – Strongly disagree • 2 – Disagree • 3 – Neither agree or disagree • 4 – Agree • 5 – Strongly agree

Since participating in the Fellowship Programme, my practice has changed in terms of undertaking and leading quality improvement activity?

1 – Strongly disagree • 2 – Disagree • 3 – Neither agree or disagree • 4 – Agree • 5 – Strongly agree

If you agree, please can you provide me some examples of how your knowledge, confidence and/or practice has changed? If you disagree, please mention any barriers encountered

#### **Part 4-Your Fellowship Programme Improvement Project**

Please rate your level of agreement with the statements below from 1 (Strongly Disagree) to 5 (Strongly Agree).

My Fellowship Programme Improvement Project has achieved its intended goals

1 – Strongly disagree • 2 – Disagree • 3 – Neither agree or disagree • 4 – Agree • 5 – Strongly agree

If you agree, in what way; if you disagree, what were the barriers?

My Fellowship Programme Improvement Project continues in my organisation

1 – Strongly disagree • 2 – Disagree • 3 – Neither agree or disagree • 4 – Agree • 5 – Strongly agree

My Fellowship Programme Improvement Project has now spread to other areas:

Within my organisation

1 – Strongly disagree • 2 – Disagree • 3 – Neither agree or disagree • 4 – Agree • 5 – Strongly agree

Beyond my organisation

1 – Strongly disagree • 2 – Disagree • 3 – Neither agree or disagree • 4 – Agree • 5 – Strongly agree

If you agree with the statements above, please can you provide me some examples of your project objectives, sustainability and spread? If you disagree, please mention any barriers encountered

**Part 5-Your views about potential avenues for capacity and capability building**

**Please rate your level of agreement with the statements below from 1 (Strongly Disagree) to 5 (Strongly Agree).**

Having taken part in the Fellowship Programme, I have been involved in training and supporting others (e.g. teaching) and therefore the spread of QI theory and practice?

**Locally**

1 – Strongly disagree • 2 – Disagree • 3 – Neither agree or disagree • 4 – Agree • 5 – Strongly agree

**Nationally**

1 – Strongly disagree • 2 – Disagree • 3 – Neither agree or disagree • 4 – Agree • 5 – Strongly agree

**Internationally**

1 – Strongly disagree • 2 – Disagree • 3 – Neither agree or disagree • 4 – Agree • 5 – Strongly agree

**If you agree with any of the statements above, please can you provide some examples of training and supporting others? If you disagree, please mention any barriers encountered**

My host organisation (main employer and/or Fellowship sponsor) has supported me in the above activities

1 – Strongly disagree • 2 – Disagree • 3 – Neither agree or disagree • 4 – Agree • 5 – Strongly agree

**If you agree with the statement above, please can you provide me some examples of ways in which the host organisation supported you? If you disagree, please mention any barriers encountered. Since graduating from the Fellowship Programme, I have actively engaged in the following activities:**

Sharing Fellowship Programme course materials (e.g., slides, activity sheets, resources) with colleagues within your organization.

1 – Strongly disagree • 2 – Disagree • 3 – Neither agree or disagree • 4 – Agree • 5 – Strongly agree

Sharing Fellowship Programme course materials (e.g., slides, activity sheets, resources) with others from external organizations.

1 – Strongly disagree • 2 – Disagree • 3 – Neither agree or disagree • 4 – Agree • 5 – Strongly agree

Formal training of groups of people in your organisation on how to apply theories, models and frameworks learned during the Fellowship Programme

1 – Strongly disagree • 2 – Disagree • 3 – Neither agree or disagree • 4 – Agree • 5 – Strongly agree

Coaching and/or mentoring of individuals in your organisation on how to apply theories, models and tools learned during the Fellowship Programme

1 – Strongly disagree • 2 – Disagree • 3 – Neither agree or disagree • 4 – Agree • 5 – Strongly agree

Please comment on any aspect of the above:

**Since graduating from the Fellowship Programme, I have actively contributed to the wider QI science evidence base through:**

Publishing improvement work in a peer reviewed healthcare journal Y/N (If yes, please provide details)

Publishing a general article on safety and improvement in a journal Y/N (If yes, please provide details)

Presenting a poster at a regional, national, international conference Y/N (If yes, please provide details)

Delivering a talk at a regional, national, international conference Y/N (If yes, please provide details)

Winning an award for an improvement project Y/N (If yes, please provide details)

Winning an award for leadership in safety and improvement Y/N (If yes, please provide details)

In other ways Y/N (please specify any other relevant activities undertaken)

#### **Part 6-About yourself**

**Have you changed job since your Fellowship Programme?** Yes/No (If Yes, please explain?)

**If no, to what extent, if any, has your role changed since completing the Fellowship?** Please explain:

**How much time has elapsed since graduating from the Fellowship Programme?**

(i) Less than 2 years (ii) 2-5 years (iii) 6-10 years

**Which country do you currently work in?**

**How would you describe your current role?**

**What care sector are you currently working in?**

**What is your overall experience of working in quality improvement or patient safety?**

Less than 2 years, 2-5 years, 6-10 years, 11-15 years, More than 15 years

**Please feel free to add any comments about the Fellowship Programme and/or this evaluation survey**

Please indicate if you would be willing to take part in a short telephone interview at a time of your convenience: Y/N . If yes, please enter your contact email address

**Thank you very much for completing this questionnaire. Your time, effort and help are very much appreciated**
