# Supplementary figures and images for: Multi-method evaluation of a national clinical fellowship programme to build leadership capacity for quality improvement
Source: PubMed Central journal article supplement — BMJ Open Qual. 2020 Oct 14;9(4):e000978. doi: 10.1136/bmjoq-2020-000978 (PMC7559044; doi:10.1136/bmjoq-2020-000978), 2020-10-14

Supplementary file 1-Description of the SQSF Programme

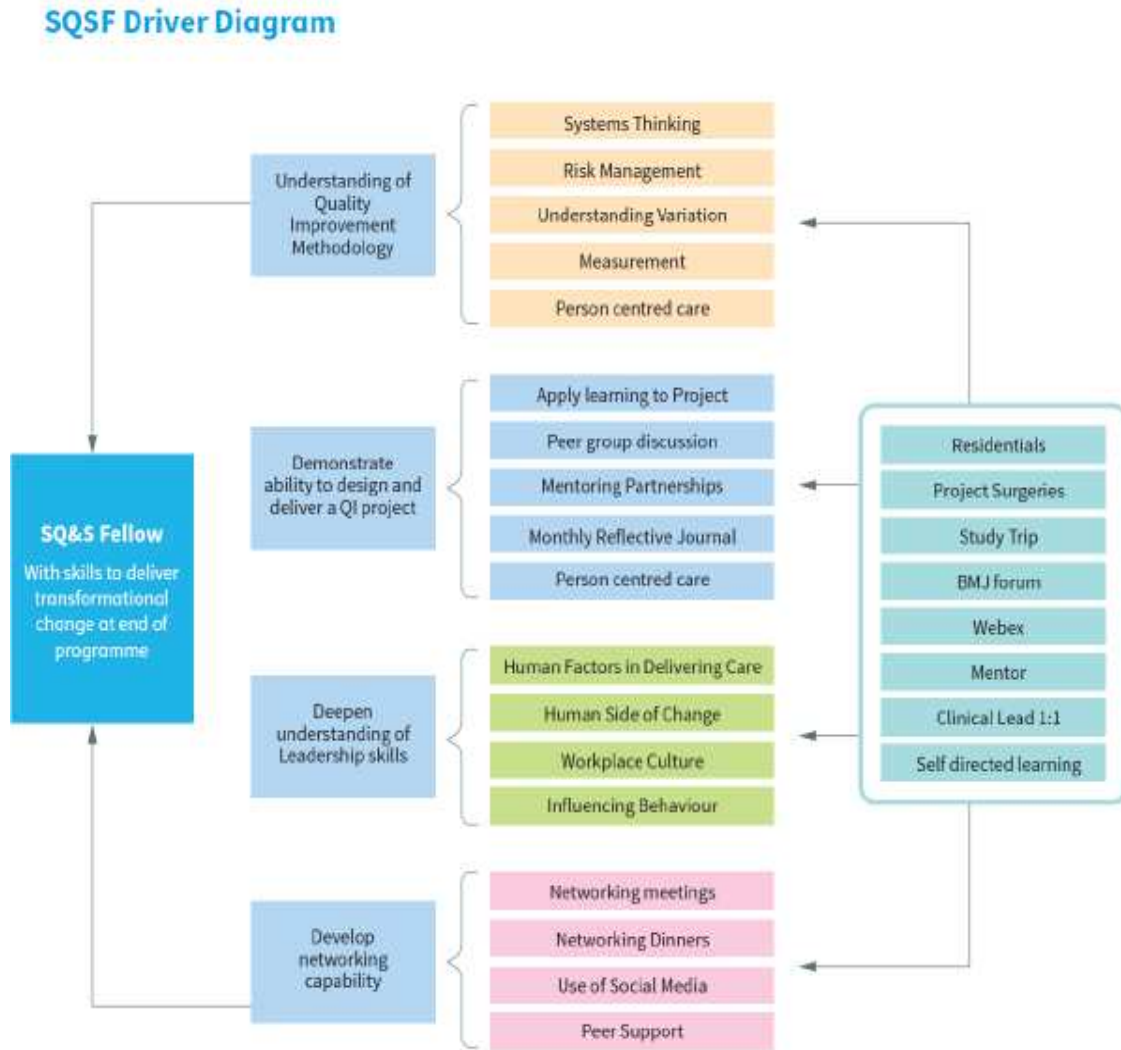

Supplement: bmjoq-2020-000978supp001.pdf [file bmjoq-2020-000978supp001.pdf]
